## Gambling in Connecticut Adolescents: Prevalence, Socio-demographic Characteristics, Trauma Exposure, Suicidality, and Other Risk Behaviors

Elina A. Stefanovics, PhD<sup>1,2,3</sup>, Zu Wei Zhai, PhD<sup>4</sup>, Marc N. Potenza MD, PhD<sup>1,5,6,7,8,9</sup>

1. Department of Psychiatry, Yale University School of Medicine, New Haven, CT, USA.

2. U.S. Department of Veterans Affairs New England Mental Illness Research and Education Clinical Center (MIRECC), West Haven, CT, USA.

3. National Center on Homelessness Among Veterans, U.S. Department of Veterans Affairs, Tampa, Florida.

4. Program in Neuroscience, Middlebury College, Middlebury, VT, 05753, USA.

5. Yale Child Study Center, Yale University, New Haven, CT, USA.

6. Connecticut Mental Health Center, New Haven, CT, USA.

7. Connecticut Council on Problem Gambling, Wethersfield, CT, USA.

8. Department of Neuroscience, Yale University, New Haven, CT, USA.

9. Wu Tsai Institute, Yale University, New Haven, CT, USA.

*Corresponding author:*

Elina A. Stefanovics, PhD

VA New England Mental Illness, Research, Education and Clinical Center

VA Connecticut Healthcare System (116A-4)

950 Campbell Avenue, Building 36

West Haven, CT 06516

Tel: (203) 932-5711 ext. 5213

Fax: (203) 937-3472

E-mail: [elina.stefanovics@yale.edu](mailto:elina.stefanovics@yale.edu)

**Conflict of Interest Disclosures:** The authors report no conflict of interest with respect to the content of this manuscript. Dr. Potenza has consulted for Game Day Data, Addiction Policy Forum, AXA, Idorsia, Baria-Tek, and Opiant Therapeutics; been involved in a patent application involving Novartis and Yale; received research support from the Mohegan Sun Casino, Children and Screens and the Connecticut Council on Problem Gambling; consulted for or advised legal, gambling and non-profit entities on issues related to impulse control, internet use and addictive behaviors; performed grant reviews; edited journals/journal sections; given academic lectures in grand rounds, CME events and other clinical/scientific venues; and generated books or chapters for publishers of mental health texts.

**Funding/Support:** Drs. Stefanovics and Potenza were supported by the Connecticut Council on Problem Gambling (CCPG). Dr. Zhai was supported by the Vermont Biomedical Research Network. This manuscript does not express the views of the funding agencies. The views and opinions expressed in this work are those of the authors.

41 **Abstract**

42 Adolescent gambling is a public health concern and has been linked to suicidality and other risk  
43 behaviors and poor health correlates. This study examines relationships between adolescents  
44 reporting gambling in the past-year and a range of health risk behaviors, traumatic experiences,  
45 school performance, and receipt of social support. Data from the 2019 Youth Risk Behavior  
46 Survey in Connecticut high-school students stratified by gambling status were examined in  
47 bivariate and multivariate analyses. Among 1,807 adolescents, past-year gambling was reported  
48 by 453 or 25.4% (95% confidence interval [CI]=22.7-28.1%). Gambling prevalence was higher  
49 among older males and lower in adolescents of Asian origin. Gambling was further associated  
50 with suicidality and risk behaviors including substance use, smoking (traditional tobacco and  
51 electronic vapor use), risky use of digital technologies, unsafe sex, and aggressive behaviors.  
52 Gambling was also associated with traumatic experiences, depression/dysphoria, poor academic  
53 performance, and less social support from the family and teachers. The results of this study  
54 provide an up-to-date estimate of the current prevalence and correlates of gambling among  
55 Connecticut adolescents and underscores the importance of routine screening and monitoring of  
56 gambling behaviors, as well as interventions for other risk behaviors in this population.

57 **Keywords:** Adolescents; Gambling; Health; Addictive behaviors.

58

59

60

61

62 **Gambling in Connecticut Adolescents: Prevalence, Socio-demographic Characteristics,**  
63 **Trauma Exposure, Suicidality, and Other Risk Behaviors**

64

65 **INTRODUCTION**

66 Gambling involves risking something of value (money or other material goods) on an event of an  
67 uncertain outcome in the hope of winning something of greater value. Most people consider  
68 gambling to be a harmless form of entertainment and an enjoyable form of recreation (1-3).  
69 However, in some individuals gambling may escalate to levels that leads to significant gambling-  
70 related personal and social problems, with a sizable minority developing gambling disorder  
71 (GD). The etiology of GD is complex and multifactorial and includes a combination of  
72 biological, psychological, and social vulnerability that vary across individuals (4).

73 Adolescents appear particularly vulnerable to developing GD. The prevalence of GD among  
74 adolescents is higher than among adults (5-7), with 0.2%–12.3% of youth meeting diagnostic  
75 criteria for problem gambling worldwide (7). Brain developmental changes during adolescents  
76 years have important implications for behavior (8). Cognitive control is not fully developed and  
77 hormonal changes may generate emotional lability and greater responsivities to rewards or stress  
78 (9). Young people may inadequately assess risk levels of activities such as gambling (10, 11),  
79 have limited life experience, and are more vulnerable to peer influence (12), marketing  
80 campaigns (13, 14), and gambling advertisements than adults (15). Thus, adolescents may have  
81 multiple risk factors compared to adults (16).

82 Sociodemographic features of adolescents who gamble include older age and male gender, with  
83 older adolescent boys tending to gamble more often (Camirand, 2014) and bet higher amounts of  
84 money (17). Male adolescents exposed to gambling at early ages appear at greater risk for  
85 developing gambling problems in the future (18). Adult gambling habits often arise from patterns  
86 developed during childhood and adolescence (19). Other gambling-associated correlates include  
87 substance use and mental health concerns (20, 21), suicidality (22), delinquency (23), and trauma  
88 exposure (24). Protective factors against gambling problem may include female gender (25),  
89 well-being, social support (26) and parental involvement and monitoring (27). The combination  
90 of risk and protective factors as well as availability of specific forms of gambling should be  
91 considered for prevention and intervention. For example, when gambling opportunities are  
92 limited or non-existent, individuals may engage in other risk behaviors as a means of  
93 stress/anxiety reduction.

94 Adolescents have considerable exposure to gambling. New gambling opportunities are emerging  
95 and receiving media coverage, and adolescents participate in multiple types of gambling. Despite  
96 age restrictions (Emond & Griffiths, 2020), many youth gamble through lotteries (28), the  
97 internet (29), video games (30), slot machines (31), poker (32), and casino games (33), among  
98 other forms. High consumption of video games and esports have been linked to gambling,  
99 particularly among male youth (34, 35). The practice of competitive video gaming, also known  
100 as eSports (e.g., sport competition using video games as platforms for competition between two  
101 or more persons (36), sometimes organized into leagues and tournaments (37), is rapidly  
102 becoming popular in public schools across the country (38-40). Connecticut was the first state to  
103 officially welcome eSports into high schools in 2017. Although gambling can significantly

104 impact adolescents' lives, it is often unnoticed by teachers and parents until it reaches  
105 problematic level (41).

106 Consistent with the problem behavior theory (PBT), gambling often co-occurs with multiple  
107 other risk behaviors (42). According to the PBT, both internal and external factors may  
108 contribute to engagement in problematic behaviors (43). The conceptual structure that explains  
109 problem behavior consists of three elements: perceived environments (e.g., parental support,  
110 encouragement, and control, peer influences), personality (e.g., low self-esteem, low academic  
111 achievement, life satisfaction), and behavior (e.g., experimental, or regular use of substances,  
112 risky sexual activity, irresponsible driving). There are factors within each element that may be  
113 responsible for the balance between risk and protective factors that determines whether or not the  
114 individual will engage in problematic behaviors. The PBT also suggests that as one type of  
115 problematic behavior increases, the likelihood of the occurrence of other problem behaviors also  
116 increases. Co-existence of these behaviors may also be explained by common underlying risk  
117 factors, supporting the notion of a problem behavior syndrome (44).

118 Although the PBT suggests that one risk behavior may elevate the likelihood of others, most  
119 studies have not compared a full range of potentially co-occurring problem behaviors in the same  
120 analysis, particularly as new emerging risk behaviors related to digital technology use and  
121 electronic delivery of drugs like nicotine have become more prevalent. The present investigation  
122 seeks to address gaps in the existing research and uses recently collected data to examine the  
123 associations between past-year gambling and other health risk behaviors, including substance  
124 use, tobacco and electronic vapor product use, sexual behaviors, risky use of digital technologies,  
125 and risk activities on school property. To do so, we interrogated data from the year prior to the  
126 COVID-19 pandemic. Specifically, in the current study, we sought to provide insight into

127 adolescent gambling and risk behaviors in a contemporary, representative sample of Connecticut  
128 high-school students participating in the 2019 Youth Risk Behavior Survey (YRBS). In this  
129 exploratory study, we had three specific aims: (1) characterize the prevalence of past-year  
130 gambling among Connecticut high-school students; (2) identify sociodemographic characteristics  
131 associated with gambling; and (3) assess trauma exposure, other risk behaviors, suicidality,  
132 homelessness, health status, academics, and social support associated with gambling. We  
133 hypothesized that adolescent gambling would be prevalent, particularly among older males, and  
134 would associate with trauma exposure, multiple risk behaviors, and other concerns including  
135 suicidality.

## 136 **MATERIALS AND METHODS**

### 137 **Participants**

138 Cross-sectional YRBS data collected in 2019 from public high-school students in Connecticut  
139 were analyzed. Altogether, 2,015 students from a total of 33 public, charter, and vocational high  
140 schools in Connecticut were surveyed during the spring of 2019. Students completed a self-  
141 administered, anonymous, 99-item questionnaire collecting data about demographics  
142 characteristics and participation in risk behaviors including ones potentially contributing to  
143 unintentional injuries and violence, sexual behaviors potentially contributing to unintended  
144 pregnancies and sexually transmitted diseases, alcohol, tobacco and other drug use, and poor  
145 physical activity. A description of data collection procedures in the YRBS can be obtained  
146 elsewhere (<http://www.cdc.gov/yrbss>).

147 The survey procedures have been previously described (45). Briefly, the school response rate  
148 was 66%, the student response rate was 82%, and the overall response rate was 54%. The results

149 were representative of all students in grades 9-12. Permission for the survey was obtained  
150 through school administrations. Initially, school superintendents were notified regarding  
151 selection of their schools to participate. Following superintendent approval, permission from  
152 school principals was obtained. Before survey administration, parental permission was obtained.  
153 Teachers and/or students of selected classrooms could decline participation. Parents were mailed  
154 letters outlining the study, and letters directed parents to contact their schools should they wish to  
155 decline their child's/children's participation. Active consent, in which parents affirmed and  
156 authorized permission, was obtained when required. All procedures were performed in  
157 accordance with the 1964 Helsinki Declaration and its amendments. Surveys were administered  
158 at each school in a single day. Answers were anonymous and confidential, and students were  
159 reminded that participation was voluntary. No personal identifying information was collected.  
160 School and classroom codes were removed from the final dataset. The Center for Disease  
161 Control (CDC) cleaned and coded the dichotomous variables from the raw data in the final data  
162 set. Survey procedures were designed to protect privacy of the students by allowing for  
163 anonymous and voluntary participation. During survey administration, students completed the  
164 self-administered questionnaire during one class period and recorded their responses directly on  
165 a computer-scannable booklet. The CDC's Institutional Review Board approved the protocol for  
166 the YRBS. This research has been deemed exempt from Yale University School of Medicine  
167 IRB review by the Human Subjects Committee. This protocol has been determined to be exempt  
168 under federal regulation 45 CFR 46.101(b)(2). Exempt studies do not require annual IRB review.

## 169 **Measures**

170 *Socio-demographics characteristics* included age ( $\leq 15$  years, 16-17 years,  $\geq 18$  years), sex  
171 (female/male), and race/ethnicity (Black, Hispanic/Latino, White and other).

172  
173 ***Gambling*** was assessed with the question, “During the past 12 months, how many times have  
174 you gambled on a sports team, gambled when playing cards or a dice game, played one of your  
175 state's lottery games, gambled on the Internet, or bet on a game of personal skill such as pool or a  
176 video game?” If respondents gambled one or more times during the past 12 months, they were  
177 classified as having gambling; otherwise, they were classified as having non-gambling.

178 ***Trauma variables:*** Adolescents were assessed on trauma-related measures including feeling  
179 unsafe at school in the past 30 days, as well as having experienced threat or injury with a weapon  
180 at school, physical fighting, dating violence (sexual and/or physical assault by a dating partner),  
181 bullying at school, and electronic bullying (bullied through texting and social media) in the past  
182 12 months; and ever having been forced into sexual intercourse in one’s lifetime. Homelessness  
183 was measured by the question, “During the past 30 days, did you ever sleep away from your  
184 parents or guardians because you were kicked out, ran away, or were abandoned?”

185 ***Suicidality/self-injury:*** Adolescents were assessed on past-year suicide attempts (yes/no),  
186 suicidal ideation (yes/no), and non-suicidal self-injury (NSSI) (yes/no).

187 ***Risky use of digital technologies*** was assessed using 3 questions. Adolescents were asked a  
188 questions concerning ***video game and computer use*** other than for school purposes for more than  
189 3 hours daily (yes/no) and whether they were ***talking on a cell phone or texting/e-mailing*** while  
190 driving in the past 30 days (yes/no).

191 ***Substance use***

192 ***Medication misuse*** included questions about the use of pain medication without a doctor’s  
193 prescription (yes/no) and ever having taken over-the-counter medications to get high (yes/no).

194



195 ***Binge drinking*** was assessed as heavy drinking of alcohol ( $\geq 4$  drinks in a row for females,  $\geq 5$   
196 drinks in a row for males) one or more times in the past 30 days (yes/no).

197 ***Lifetime actual and synthetic marijuana use*** was assessed with the questions, “During your  
198 lifetime, how many times did you use marijuana (synthetic marijuana)?” Responses were coded  
199 as 0 in cases of “never” and 1 if other options were chosen.

200 ***Lifetime electronic vapor use*** was dichotomized using the question, “During your lifetime, how  
201 many times did you use electronic vapor?” Responses were coded as 0 in case “never” and 1 if  
202 other options were chosen.

203 ***Current marijuana and alcohol use*** was assessed using single survey items (“During the past 30  
204 days, how many times did you use marijuana/alcohol?”) and coded dichotomously yes/no, with a  
205 “no” response defined as a “never” response.

#### 206 ***Tobacco and electronic vapor use***

207 ***Current tobacco use:*** Two questions concerned the use of any cigarettes or cigars in the past 30  
208 days (yes/no).

209 ***Current electronic vapor use*** was assessed with the questions, “During the past 30 days, did you  
210 use any electronic vapor product?” and “use them on the school property?” (yes/no).

211 ***Risky sexual behavior*** was assessed with two questions: “Have you ever had intercourse with  
212 four or more persons?” and “Did you drink alcohol before the last time you had sex?” (yes/no).

#### 213 ***Aggressive behavior***

214 ***Risk activities on school property*** were assessed with two questions assessing having carried a  
215 gun, knife, or club (yes/no) or been offered drugs at school (yes/no) during the past 30 days.

216 **Physical fights** reflected past-12-month involvement in a physical fight (yes/no).

217 **Health-related variables:** Questions included a student’s subjective consideration of general  
218 health as good (yes/no) and sleeping 8 hours or more daily (yes/no). Depressive symptoms were  
219 assessed with the question, “In the last 12 months, did you feel sad or hopeless almost every day  
220 for more than 2 weeks?”

221 **Academics** were assessed with two questions investigating involvement in special education  
222 programs (yes/no) and grade average (mostly grades of A or B vs. lower).

223 **Social support variables** included family support measured by the question, “Do you agree that  
224 your family loves you and gives you help and support when you need it?” Teacher support was  
225 measured by the question, “Is there at least one teacher or other adult at school that you can talk  
226 if you have a concern?” Mental health support was measured by the question, “Do you receive  
227 mental health help and support when needed?”

## 228 **Data analysis**

229 Analyses proceeded in three steps. First, to summarize variables, descriptive statistics were  
230 computed. Second, Bonferroni-corrected  $\chi^2$  and analyses of variance (ANOVAs) were conducted  
231 to compare characteristics (e.g., substance use, tobacco use, electronic vaping, risky sexual  
232 behavior, risky use of digital technologies, aggressive behaviors, suicidality/self-injury, trauma  
233 variables, subjective health status, academics, and social support) between groups (gambling vs.  
234 non-gambling). Second, unadjusted and adjusted weighted frequencies of variables were  
235 calculated. Third, a series of multivariable binary logistic regression analyses were conducted to  
236 assess relationships and independent associations between group membership and substance use,  
237 risky behavior, suicidality/self-injury, trauma variables, health status, academics, and social

238 support outcomes. These analyses were adjusted for sociodemographic variables (age, gender,  
239 and race/ethnicity). All analyses were performed using SAS 9.4 statistical software (SAS  
240 Institute Inc., Cary, North Carolina, U.S.) (46). To make statistically valid inferences from the  
241 sample to the study population, we analyzed data considering the sample design and sample-  
242 calculated weights. The survey procedures were employed to compute variances that accurately  
243 reflected the complex sample design and estimation procedures. Consequently, sample  
244 proportions were based on weighted percentages. Statistical significance was evaluated at the  
245 0.05 level.

246

## 247 **Ethics**

248 The high-school survey and procedures were approved by the Yale School of Medicine IRB, and  
249 all procedures were approved by the participating high-schools. Passive consent procedures were  
250 adopted for parental consent. Parents of students were notified by mail of the survey and that to  
251 exclude their child's participation in the study, they should contact the school or the study team.  
252 Parental permission for their child's participation was implied if they did not make contact with  
253 the team or school. Students were informed at the time of survey administration that it was being  
254 used for a study, that their participation was fully voluntary, and that they could refuse to fill out  
255 the survey if they wished. Those who did not participate in the survey were allowed to do school  
256 work while others worked on the survey. Students were also told not to include identifying  
257 information on the survey to maintain anonymity. Students were given a pen to fill out the  
258 survey. Procedures were in accordance with the Declaration of Helsinki (2013).

## 259 **RESULTS**

260 **Descriptive statistics**

261 Data were available for 2,015 individuals. Respondents who had missing data on the gambling  
262 question (n=208; 10%) were excluded from analyses. Thus, the total analytic sample consisted of  
263 1,807 individuals, of whom 891 (49.7%) were males. Approximately one-quarter (n= 453;  
264 25.4%) reported gambling one or more times during the past 12 months. Slightly more than one-  
265 third of the sample (n=733, 34.3%) was 15 years old or younger. Almost half of the sample  
266 included 16- and 17-year-old students (n=855; 45.7%), with the remainder of the sample (n=213;  
267 11.8%) being aged 18 years and older. Slightly more than half of the sample (n=902; 57.7%) was  
268 White; 11.6% (n=159) was Black; 5.1% (n=121) was Hispanic; 3.7% (n=84) was Asian; and  
269 21.9% was multiracial or other race (n=525).

270

271 The gambling patterns among persons who reported having gambled in the past 12 months are  
272 presented in Figure 1. More than half of adolescents reported that they had gambled 1–2 times in  
273 the past 12 months. Almost one-fifth reported having gambled 3–9 times in the same period, and  
274 8.4% reported having gambled 40 or more times. The remainder consisted of less than 12% of  
275 the total that reported having gambled 10 to 39 times.

276

277 ***Figure 1 Gambling patterns***

278

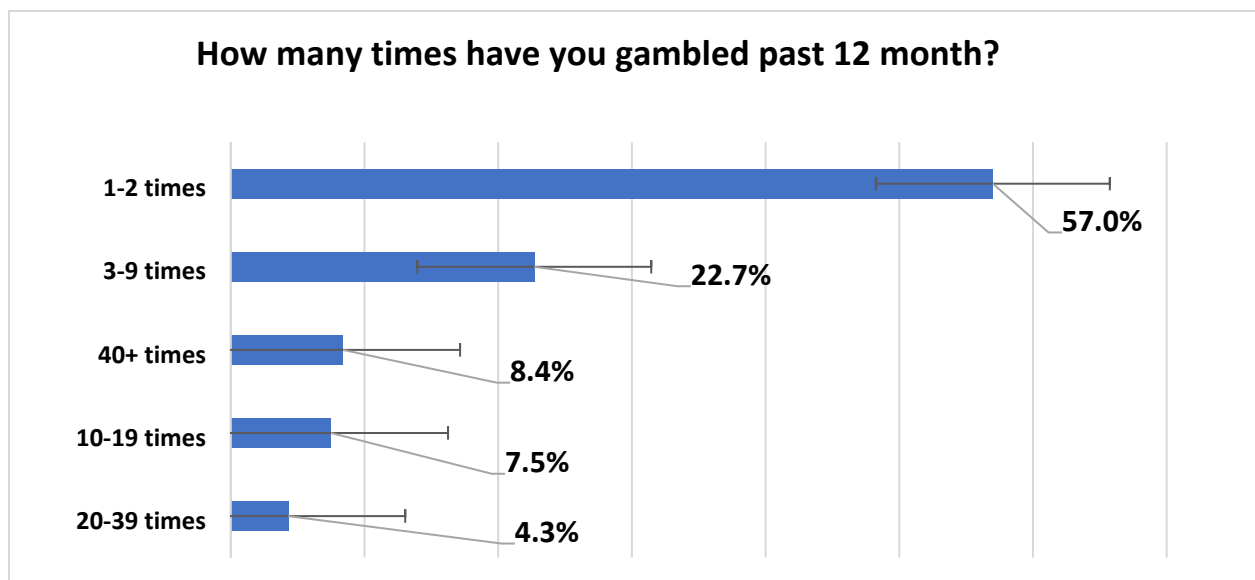

279

280

281 **Bivariate and multivariate analyses.**

282 *Table 1* displays the sociodemographic characteristics of adolescents with and without gambling.

283 Adolescents who gambled were more likely to be older and male and less likely to be of Asian

284 heritage.

**Table 1. Socio-demographic characteristics of the sample stratified by gambling status (N=1,807)**

| Variable              | Gambling      |       | Non-Gambling    |       | Statistical Test   |        | Gambling vs Non-Gambling |                       |             |
|-----------------------|---------------|-------|-----------------|-------|--------------------|--------|--------------------------|-----------------------|-------------|
|                       | n=453; 25.4%* |       | n=1,354; 74.6%* |       | Rao-Scott $\chi^2$ | p      | OR                       | 95% Confidence Limits |             |
|                       | n             | %*    | n               | %*    |                    |        |                          |                       |             |
| <b>Age in Years</b>   |               |       |                 |       | 22.91              | <.0001 |                          |                       |             |
| 15 and younger        | 167           | 34.86 | 566             | 40.02 |                    |        | ref                      |                       |             |
| 16-17                 | 200           | 46.37 | 655             | 50.52 |                    |        | 1.05                     | 0.82                  | 1.36        |
| 18 and older          | 84            | 18.77 | 129             | 9.46  |                    |        | <b>2.28</b>              | <b>1.47</b>           | <b>3.52</b> |
| <b>Sex</b>            |               |       |                 |       | 75.92              | <.0001 |                          |                       |             |
| Male                  | 303           | 67.81 | 588             | 43.51 |                    |        | <b>2.74</b>              | <b>2.09</b>           | <b>3.57</b> |
| Female                | 147           | 32.19 | 761             | 56.49 |                    |        | ref                      |                       |             |
| <b>Race/ethnicity</b> |               |       |                 |       | 9.58               | 0.04   |                          |                       |             |
| White                 | 220           | 56.02 | 682             | 58.31 |                    |        | ref                      |                       |             |

|                       |     |       |     |       |             |             |             |
|-----------------------|-----|-------|-----|-------|-------------|-------------|-------------|
| Black                 | 49  | 13.91 | 110 | 10.85 | 1.33        | 0.81        | 2.19        |
| Hispanic              | 30  | 4.92  | 91  | 5.12  | 1.00        | 0.55        | 1.82        |
| Asian                 | 11  | 1.67  | 73  | 4.34  | <b>0.40</b> | <b>0.22</b> | <b>0.75</b> |
| Multiracial and other | 141 | 23.48 | 384 | 21.37 | 1.14        | 0.82        | 1.59        |

285 \*Weighted percent; bolded are significant findings

286

287 Table 2 presents suicidality, traumatic experiences, substance use, and other risk behaviors

288 stratified by gambling status and adjusted for age, sex, and race.

289

**Table 2. Traumatic experiences, suicidal/self-injurious and other risk behaviors stratified by gambling status (N=1,807).**

| Variables                                      | Gambling      |       | Non-Gambling    |       | Statistical Test   |        | Gambling vs Non-Gambling |                       |             |
|------------------------------------------------|---------------|-------|-----------------|-------|--------------------|--------|--------------------------|-----------------------|-------------|
|                                                | n=453; 25.4%* |       | n=1,354; 74.6%* |       | Rao-Scott $\chi^2$ | p      | AOR **                   | 95% Confidence Limits |             |
|                                                | n             | %*    | n               | %*    |                    |        |                          |                       |             |
| <b>Traumatic experiences</b>                   |               |       |                 |       |                    |        |                          |                       |             |
| Bullied at school                              | 94            | 19.54 | 236             | 17.80 | 0.72               | 0.40   | 1.31                     | 0.97                  | 1.77        |
| Electronically bullied                         | 95            | 20.55 | 171             | 12.55 | 14.27              | 0.0002 | <b>2.15</b>              | <b>1.61</b>           | <b>2.89</b> |
| Homelessness                                   | 68            | 15.48 | 60              | 3.97  | 93.40              | <.0001 | <b>4.74</b>              | <b>3.15</b>           | <b>7.13</b> |
| Experienced forced sex                         | 49            | 10.79 | 64              | 4.40  | 30.26              | <.0001 | <b>3.67</b>              | <b>2.51</b>           | <b>5.36</b> |
| Threatened or injured with weapon at school    | 48            | 10.61 | 78              | 5.38  | 8.36               | 0.01   | <b>2.09</b>              | <b>1.21</b>           | <b>3.59</b> |
| Felt unsafe at school                          | 54            | 11.15 | 78              | 5.55  | 22.56              | 0.002  | <b>2.22</b>              | <b>1.41</b>           | <b>3.50</b> |
| Experienced physical or sexual dating violence | 69            | 21.39 | 109             | 14.02 | 5.65               | 0.017  | <b>2.18</b>              | <b>1.37</b>           | <b>3.46</b> |
| <b>Substance use</b>                           |               |       |                 |       |                    |        |                          |                       |             |
| Prescription medications without prescription  | 27            | 32.20 | 41              | 28.56 | 0.21               | 0.64   | 1.36                     | 0.61                  | 3.07        |
| Buy over-the-counter medications to get high   | 46            | 10.18 | 37              | 2.47  | 38.60              | <.0001 | <b>4.07</b>              | <b>2.55</b>           | <b>6.49</b> |
| Binge drinking (PM)                            | 105           | 24.27 | 124             | 9.42  | 53.67              | <.0001 | <b>3.30</b>              | <b>2.49</b>           | <b>4.37</b> |
| Alcohol use (PM)                               | 168           | 38.81 | 279             | 21.59 | 38.72              | <.0001 | <b>2.53</b>              | <b>1.89</b>           | <b>3.39</b> |
| Marijuana use (PM)                             | 135           | 30.99 | 250             | 18.70 | 13.72              | 0.0002 | <b>1.98</b>              | <b>1.36</b>           | <b>2.89</b> |
| Marijuana use (LT)                             | 207           | 48.82 | 423             | 31.85 | 34.73              | <.0001 | <b>2.26</b>              | <b>1.74</b>           | <b>2.93</b> |

|                                                                        |     |       |      |       |        |        |             |             |              |
|------------------------------------------------------------------------|-----|-------|------|-------|--------|--------|-------------|-------------|--------------|
| Synthetic marijuana use (LT)                                           | 55  | 12.70 | 53   | 3.96  | 32.74  | <.0001 | <b>3.85</b> | <b>2.24</b> | <b>6.61</b>  |
| <b><i>Tobacco and electronic vapor use</i></b>                         |     |       |      |       |        |        |             |             |              |
| Cigarettes use (PM)                                                    | 34  | 7.56  | 29   | 2.21  | 23.49  | <.0001 | <b>3.52</b> | <b>1.87</b> | <b>6.62</b>  |
| Cigar use (PM)                                                         | 47  | 10.75 | 18   | 1.39  | 105.51 | <.0001 | <b>6.25</b> | <b>3.25</b> | <b>12.02</b> |
| Electronic vapor product use (PM)                                      | 155 | 38.24 | 305  | 23.69 | 25.87  | <.0001 | <b>2.19</b> | <b>1.65</b> | <b>2.93</b>  |
| Electronic vapor product use (LT)                                      | 253 | 57.79 | 540  | 40.36 | 36.81  | <.0001 | <b>2.21</b> | <b>1.72</b> | <b>2.82</b>  |
| Electronic vapor use at school (PM)                                    | 93  | 20.29 | 110  | 8.20  | 36.14  | <.0001 | <b>2.92</b> | <b>2.07</b> | <b>4.12</b>  |
| <b><i>Risky Sexual behavior</i></b>                                    |     |       |      |       |        |        |             |             |              |
| Multiple sex partners                                                  | 46  | 11.91 | 70   | 5.66  | 15.70  | <.0001 | <b>1.87</b> | <b>1.16</b> | <b>3.02</b>  |
| Having sex while drunk                                                 | 41  | 31.05 | 49   | 16.75 | 12.11  | 0.0005 | <b>2.59</b> | <b>1.63</b> | <b>4.09</b>  |
| <b><i>Risky use of digital technologies</i></b>                        |     |       |      |       |        |        |             |             |              |
| Play video games or use computer not for school                        | 402 | 89.43 | 1086 | 80.08 | 12.65  | 0.0004 | <b>1.73</b> | <b>1.12</b> | <b>2.68</b>  |
| Talking on cell phone while driving                                    | 119 | 51.97 | 181  | 31.28 | 58.53  | <.0001 | <b>2.31</b> | <b>1.77</b> | <b>3.01</b>  |
| Texting/e-mailing while driving                                        | 96  | 45.92 | 143  | 26.79 | 26.79  | 0.0002 | <b>2.15</b> | <b>1.53</b> | <b>3.02</b>  |
| <b><i>Suicidality/self-injury</i></b>                                  |     |       |      |       |        |        |             |             |              |
| Attempted suicide                                                      | 50  | 10.77 | 71   | 5.14  | 20.11  | <.0001 | <b>2.82</b> | <b>1.87</b> | <b>4.26</b>  |
| Considered suicide                                                     | 72  | 15.76 | 165  | 11.76 | 3.87   | 0.049  | <b>1.65</b> | <b>1.12</b> | <b>2.43</b>  |
| Non-suicidal self-injury (NSSI)                                        | 88  | 17.91 | 207  | 14.55 | 2.86   | 0.01   | <b>1.55</b> | <b>1.14</b> | <b>2.12</b>  |
| <b><i>Aggressive behaviors (PM)</i></b>                                |     |       |      |       |        |        |             |             |              |
| Risk activity on school property (carried a weapon on school property) | 31  | 6.61  | 31   | 2.22  | 31.21  | <.0001 | <b>2.63</b> | <b>1.66</b> | <b>4.15</b>  |
| Physical fight                                                         | 155 | 34.65 | 201  | 14.19 | 105.25 | <.0001 | <b>3.09</b> | <b>2.32</b> | <b>4.11</b>  |

\*weighted %

\*\* AOR adjusted for age, race, and gender; bolded are significant findings

PM=past month

LT=lifetime

290

291 Adolescents who gambled reported more traumatic experiences including electronic bullying,

292 forced sex, physical and sexual dating violence, having been threatened or injured with a weapon

293 on school property, having felt unsafe at school, and homelessness. The gambling group was

294 more likely to report alcohol and binge drinking, marijuana and synthetic marijuana use, and use

295 of over-the-counter medication to get high. The gambling group was more likely to report having

296 played video games or using a computer for other than school purposes three or more hours per

297 day, using alcohol and/or marijuana (current and lifetime), engaging in binge drinking, and

298 misusing over-the-counter medication to get high. They were also more likely to report having

299 used tobacco (cigarettes and cigars) and electronic vapor products, been offered drugs at school,

300 engaged in risky sexual behaviors (sex with multiple partners and sex while drunk), and  
 301 involvement in aggressive behaviors (e.g., carrying a weapon on school property, having been in  
 302 a physical fight on school property). Adolescents from the gambling group reported they were  
 303 more likely to have considered suicide and experienced NSSI, and twice as likely to have  
 304 attempted suicide.

305 *Table 3* presents subjective health, academic performance, and social support measures.

**Table 3. Perceived health status, academics and support variables stratified by gambling status (N=1,807)**

| Variables                               | Gambling      |       | Non-Gambling    |       | Statistical Test   |        | Gambling vs Non-Gambling |                       |             |
|-----------------------------------------|---------------|-------|-----------------|-------|--------------------|--------|--------------------------|-----------------------|-------------|
|                                         | n=453; 25.4%* |       | n=1,354; 74.6%* |       | Rao-Scott $\chi^2$ | p      | AOR*                     | 95% Confidence Limits |             |
|                                         | n             | %*    | n               | %*    |                    |        |                          | *                     |             |
| <b><i>Perceived health status</i></b>   |               |       |                 |       |                    |        |                          |                       |             |
| Dysphoria/depression                    | 148           | 31.53 | 428             | 30.50 | 0.18               | 0.04   | <b>1.34</b>              | <b>1.01</b>           | <b>1.77</b> |
| Considered general health as good       | 265           | 61.15 | 738             | 55.57 | 5.01               | 0.17   | 1.17                     | 0.93                  | 1.47        |
| Slept 8 hour or more                    | 85            | 18.78 | 293             | 21.79 | 1.30               | 0.21   | 0.80                     | 0.55                  | 1.16        |
| <b><i>Academics</i></b>                 |               |       |                 |       |                    |        |                          |                       |             |
| Mostly A and B grades                   | 308           | 68.68 | 1105            | 82.82 | 42.47              | <.0001 | <b>0.50</b>              | <b>0.36</b>           | <b>0.69</b> |
| Received special education              | 51            | 10.16 | 153             | 11.30 | 0.33               | 0.56   | 0.92                     | 0.57                  | 1.49        |
| <b><i>Social Support</i></b>            |               |       |                 |       |                    |        |                          |                       |             |
| Family support                          | 357           | 79.80 | 1165            | 86.85 | 16.00              | <.0001 | <b>0.58</b>              | <b>0.41</b>           | <b>0.82</b> |
| Teacher support                         | 265           | 58.28 | 881             | 65.18 | 6.21               | 0.01   | <b>0.73</b>              | <b>0.58</b>           | <b>0.92</b> |
| Received mental health help when needed | 65            | 20.98 | 258             | 25.41 | 2.84               | 0.09   | 0.74                     | 0.52                  | 1.06        |

\*Weighted

\*\*AOR adjusted for age, race, and gender

306  
 307 The gambling group reported poorer school performance, less family and teacher support, and  
 308 greater likelihood of having felt sad or hopeless almost every day during more than two weeks in  
 309 the last year.

310



311 **DISCUSSION**

312 This study examined 2019 data regarding gambling behaviors and their correlates among high-  
313 school students in Connecticut. Approximately one-quarter (25.4%) reported past-year gambling.  
314 This estimate appears higher than that previously found (18.6%) among Connecticut adolescents  
315 surveyed in 2017 (47). These differences may reflect, in part, the use of slightly different  
316 wording in the question to assess gambling involvement in the past year in these two samples.  
317 However, other possibilities (e.g., the increasing popularity and social acceptability of sport  
318 gambling, especially following the introduction of daily fantasy sports in Connecticut in 2017  
319 and their promotion through frequent advertisements) warrant consideration. The observed  
320 gambling prevalence estimate is lower than estimates based on national telephone-based surveys  
321 (44.3% to 68%) and in the low range of what has been reported among students in school-  
322 based surveys (24.4% to 86%) and convenience samples (22.5% to 47.4%), although changes  
323 over time in the prevalence of adolescent gambling during the early part of the second decade of  
324 this millennium should also be considered (48, 49). Although half of the adolescents who have  
325 been gambled last year reported doing it only 1 or 2 times, 12.7% of gambling adolescents  
326 reported gambling 20 or more times, with 8.4% reporting more than 40 times.

327  
328 Past-year gambling was higher among male adolescents, consistent with previous findings (7, 18,  
329 50). Previous studies have reported differences in gambling in different racial/ethnic groups (51).  
330 Here, adolescents with past-year gambling were less likely to identify as Asian. The extent to  
331 which the findings may relate to immigrant status warrants additional examination given that  
332 among adults, the prevalence of gambling and problem gambling was markedly lower among  
333 first-generation immigrants than among native-born Americans and second and third-generation

334 individuals (52). In an earlier study of Connecticut adolescents, Asian-American adolescents  
335 more often reported not gambling (53). However, their study also found that if the Asian-  
336 American adolescents did report gambling, they showed higher levels of at-risk/problematic  
337 gambling. Taken together, differences in problem-gambling severity and gambling perceptions  
338 among Asian youth suggest possible cultural differences (53), with possible differences in  
339 parenting styles warranting investigation (54). While currently speculative, this and other  
340 possibilities warrant additional investigation.

341  
342 Consistent with some prior reports, adolescents reporting past-year gambling, relative to those  
343 reporting no gambling, were more likely to report past-year suicidal ideation and NSSI and  
344 lifetime suicide attempts. One recent study associated gambling and suicide attempts, with the  
345 likelihood of suicide attempts increasing with increasing problem-gambling severity in both  
346 young women and men (22). Certain groups may be particularly vulnerable. For example,  
347 gambling initiation statistically predicted suicidal ideation among Black but not White youth  
348 (51). Connecticut high-school students with NSSI have reported more permissive views  
349 regarding gambling and were more likely to exhibit at-risk/problem gambling (55). Strong  
350 relationships between problem-gambling severity and NSSI suggest that adolescents may engage  
351 in gambling as a maladaptive coping strategy to alleviate suffering (55). Taken together, these  
352 findings suggest that adolescents who gamble may be at elevated risk for suicidality and NSSI. A  
353 history of suicide attempts and suicidal ideation was found to be independently associated with  
354 higher rates of risk-taking behavior such as gambling, alcohol and drug use, aggressive behavior,  
355 and nicotine use (56). Other studies have also associated health risk behaviors with suicidal

356 ideation and attempts among adolescents, and recognition of these health risk behaviors may be  
357 one means of understanding who may be at increased risk of suicidality (57).

358  
359 Adolescents who gambled reported more frequently substance use, including alcohol, tobacco,  
360 and marijuana use, similar to prior observations (21, 48, 58). Such gambling/substance-use  
361 relationships were found to extend to use of electronic vaping devices, a newer substance-related  
362 concern among youth (59). Further, gambling in adolescents was associated with other risk  
363 behaviors including unsafe driving (using cell phone/e-mailing/ texting while driving) and  
364 frequent use of computers or cell phones and risky sexual behavior. Gambling was also  
365 associated with aggressive behaviors including illegal activities on school grounds and getting  
366 into physical fights, as in prior studies of Connecticut high-school students (21). The association  
367 between problem-gambling severity and weapon-carrying is also consistent with previous studies  
368 of Connecticut high-school students (21, 47).

369  
370 Traumatic experiences were more prevalent in the gambling group and included bullying,  
371 physical violence, forced sex, homelessness, and feelings of being unsafe on school property.  
372 Adolescents with past-year gambling also reported low social support. Specifically, they felt less  
373 family support and love as well as a lack of support at school, such as a person they could talk to  
374 if they had a problem. These findings resonate with earlier findings involving adolescents (60).  
375 Youth with gambling problems typically report having experienced more negative life events  
376 relative to those who do not gamble (61-63). The extent to which such negative life events may  
377 relate to the greater likelihoods for depression/ and poor academic performance observed in this  
378 study warrants further examination.

379  
380 Adolescence is a time when many youths learn how to regulate their emotions and develop  
381 personal coping skills for dealing with stress. Some adolescents may deal with stress by  
382 engaging in risky behaviors. In such cases, gambling may appear as an attractive means to  
383 escape from stressors. According to the Pathways Model (64) and dual process models of  
384 addictions that suggest that positive-reinforcements (e.g., gambling to enhance excitement) and  
385 negative-reinforcements (e.g., gambling to relieve depressed or stress) may influence  
386 participation in and development of habitual gambling in adolescents (65), emotionally  
387 vulnerable adolescents under stress may turn to gambling in order to feel important and in  
388 control or avoid dealing with emotional problems (66-68). Emotion-based, avoidant, and  
389 distraction-orientated coping styles are more often found in adolescents who gamble excessively  
390 versus those who do not (69, 70).

391  
392 Several strengths and limitations of the study are noteworthy. The YRBS is a large  
393 epidemiological study involving self-report measures. Self-reported data are subject to biases,  
394 such as reliability on memory, social desirability, and honesty of responses. Given the illegal  
395 nature of several variables (e.g., gambling among participants younger than 18 years, illicit  
396 substance use), it is also possible that participants may have not reported engagement in certain  
397 behaviors, leading to overly conservative prevalence estimates. Alternatively, over-reporting of  
398 risk behaviors (e.g., for bravado) may also have occurred. Second, the cross-sectional design of  
399 this survey study precludes analyses or statements about potential directionality or causality.  
400 Third, although this is a representative sample, the survey was conducted in select school  
401 districts in one state, and the extent to which our findings generalize to populations outside the

402 state of Connecticut is unclear. Fourth, gambling was assessed with only one question. Thus,  
403 types and problem-severity levels of gambling could not be independently determined for  
404 analyses. Fifth, many of the questions assessing non-gambling domains were not validated  
405 scales. While this may have reduced subject burden, additional studies using empirically  
406 validated measures are needed. Sixth, the variables assessed could have been placed in different  
407 groups (for example, suicide attempts may have been considered as traumatic, but was grouped  
408 with other suicidality measures). Seventh, the COVID-19 pandemic and related stress and  
409 combative measures (spatial distancing, closures of schools) may have influenced gambling,  
410 other risk behaviors and mental health (71, 72, 73). Thus, additional studies during and following  
411 the pandemic are needed.

412  
413 Overall, results suggest that gambling is a relatively common activity among adolescents. Given  
414 that adolescents may be increasingly being exposed to various gambling opportunities online and  
415 offline, it is important to identify individuals at risk, monitor the consequences of gambling, and  
416 refer individuals for help when needed. This may be particularly relevant in Connecticut and  
417 other states in which sports gambling has been recently legalized.

418  
419 **CONCLUSION**  
420 Adolescents who gambled engaged in other risk behaviors, including newer ones that include  
421 electronic delivery of substances and use of digital technologies. Given that some of these  
422 behaviors occur on school grounds, school administrators and teachers should be aware of them  
423 and their implications for adolescent health (74). Intervention and treatment efforts should  
424 address multiple domains. Early life stressors, adverse childhood experiences and trauma warrant

425 screening and assessment. Adequate social support may function as a protective factor against  
426 gambling and problem gambling. Hence, strengthening adolescents' social support from school  
427 personnel and parents may be beneficial. Social support may be a crucial component of  
428 intervention strategies for adolescent gambling and its correlates. Strong familial relationships  
429 and open communication between adolescents, parents, and teachers may reduce the likelihood  
430 of involvement in risky behaviors such as gambling.

431

## 432 **References**

- 433 1. Potenza MN, Steinberg MA, McLaughlin SD, Wu R, Rounsaville BJ, O'Malley SS. Gender-related  
434 differences in the characteristics of problem gamblers using a gambling helpline. *American Journal of*  
435 *Psychiatry*. 2001;158(9):1500-5.
- 436 2. Kessler RC, Hwang I, LaBrie R, Petukhova M, Sampson NA, Winters KC, et al. DSM-IV pathological  
437 gambling in the National Comorbidity Survey Replication. *Psychological medicine*. 2008;38(9):1351-60.
- 438 3. Potenza MN, Kosten TR, Rounsaville BJ. Pathological gambling. *Jama*. 2001;286(2):141-4.
- 439 4. Potenza MN, Balodis IM, Derevensky J, Grant JE, Petry NM, Verdejo-Garcia A, et al. Gambling  
440 disorder. *Nature reviews Disease primers*. 2019;5(1):1-21.
- 441 5. Floros GD. Gambling disorder in adolescents: prevalence, new developments, and treatment  
442 challenges. *Adolescent health, medicine and therapeutics*. 2018;9:43.
- 443 6. Emond A, Griffiths MD, Hollén L. Problem gambling in early adulthood: A population-based  
444 study. *International Journal of Mental Health and Addiction*. 2020:1-17.
- 445 7. Calado F, Alexandre J, Griffiths MD. Prevalence of adolescent problem gambling: A systematic  
446 review of recent research. *Journal of gambling studies*. 2017;33(2):397-424.
- 447 8. Hartley CA, Somerville LH. The neuroscience of adolescent decision-making. *Current opinion in*  
448 *behavioral sciences*. 2015;5:108-15.
- 449 9. Kanwal J, Jung Y, Zhang M. Brain plasticity during adolescence: effects of stress, sleep, sex and  
450 sounds on decision making. *Anat Physiol*. 2016;6(01).
- 451 10. Hardoon KK, Derevensky JL. Child and adolescent gambling behavior: Current knowledge.  
452 *Clinical Child Psychology and Psychiatry*. 2002;7(2):263-81.
- 453 11. Volberg RA, Gupta R, Griffiths MD, Olason DT, Delfabbro P. An international perspective on  
454 youth gambling prevalence studies. *International journal of adolescent medicine and health*.  
455 2010;22(1):3-38.
- 456 12. Zhai ZW, Yip SW, Steinberg MA, Wampler J, Hoff RA, Krishnan-Sarin S, et al. Relationships  
457 between perceived family gambling and peer gambling and adolescent problem gambling and binge-  
458 drinking. *Journal of gambling studies*. 2017;33(4):1169-85.
- 459 13. Derevensky J, Sklar A, Gupta R, Messerlian C. An empirical study examining the impact of  
460 gambling advertisements on adolescent gambling attitudes and behaviors. *International Journal of*  
461 *Mental Health and Addiction*. 2010;8(1):21-34.
- 462 14. Kristiansen S, Severin-Nielsen MK. Adolescent gambling advertising awareness: A national  
463 survey. *International Journal of Social Welfare*. 2022;31(2):263-73.

- 464 15. Clemens F, Hanewinkel R, Morgenstern M. Exposure to gambling advertisements and gambling  
465 behavior in young people. *Journal of gambling studies*. 2017;33(1):1-13.
- 466 16. Sharman S, Butler K, Roberts A. Psychosocial risk factors in disordered gambling: A descriptive  
467 systematic overview of vulnerable populations. *Addictive Behaviors*. 2019;99:106071.
- 468 17. Castrén S, Kontto J, Alho H, Salonen AH. The relationship between gambling expenditure,  
469 socio-demographics, health-related correlates and gambling behaviour—a cross-sectional  
470 population-based survey in Finland. *Addiction*. 2018;113(1):91-106.
- 471 18. Shead NW, Derevensky JL, Gupta R. Risk and protective factors associated with youth problem  
472 gambling. *International journal of adolescent medicine and health*. 2010;22(1):39.
- 473 19. Dowling N, Merkouris S, Greenwood C, Oldenhof E, Toumbourou J, Youssef G. Early risk and  
474 protective factors for problem gambling: A systematic review and meta-analysis of longitudinal studies.  
475 *Clinical psychology review*. 2017;51:109-24.
- 476 20. Stefanovics EA, Potenza MN. Update on Gambling Disorder. *Psychiatric Clinics*. 2022.
- 477 21. Yip SW, Desai RA, Steinberg MA, Rugle L, Cavallo DA, Krishnan-Sarin S, et al. Health/functioning  
478 characteristics, gambling behaviors, and gambling-related motivations in adolescents stratified by  
479 gambling problem severity: Findings from a high school survey. *The American Journal on Addictions*.  
480 2011;20(6):495-508.
- 481 22. Wardle H, McManus S. Suicidality and gambling among young adults in Great Britain: Results  
482 from a cross-sectional online survey. *The Lancet Public Health*. 2021;6(1):e39-e49.
- 483 23. Kryszajtyś DT, Hahmann TE, Schuler A, Hamilton-Wright S, Ziegler CP, Matheson FI. Problem  
484 gambling and delinquent behaviours among adolescents: a scoping review. *Journal of gambling studies*.  
485 2018;34(3):893-914.
- 486 24. Storr CL, Lee GP, Derevensky JL, Ialongo NS, Martins SS. Gambling and adverse life events among  
487 urban adolescents. *Journal of Gambling Studies*. 2012;28(2):325-36.
- 488 25. Carneiro E, Tavares H, Sanches M, Pinsky I, Caetano R, Zaleski M, et al. Gender differences in  
489 gambling exposure and at-risk gambling behavior. *Journal of gambling studies*. 2020;36(2):445-57.
- 490 26. Mishra S, Beshai S, Wuth A, Refaie N. Risk and protective factors in problem gambling: an  
491 examination of psychological resilience. *International Gambling Studies*. 2019;19(2):241-64.
- 492 27. Hayer T, Griffiths MD. Gambling. *Handbook of Adolescent Behavioral Problems*: Springer; 2015.  
493 p. 539-58.
- 494 28. Zhai ZW, Hoff RA, Howell JC, Wampler J, Krishnan-Sarin S, Potenza MN. Lottery-Purchasing  
495 Adolescents: Gambling Perceptions, Problems, and Characteristics. *Journal of Gambling Studies*. 2021:1-  
496 19.
- 497 29. Potenza MN, Wareham JD, Steinberg MA, Rugle L, Cavallo DA, Krishnan-Sarin S, et al. Correlates  
498 of at-risk/problem internet gambling in adolescents. *Journal of the American Academy of Child &  
499 Adolescent Psychiatry*. 2011;50(2):150-9. e3.
- 500 30. Griffiths MD, Parke J. Adolescent gambling on the Internet: A review. *International journal of  
501 adolescent medicine and health*. 2010;22(1):59-75.
- 502 31. Giralto S, Müller KW, Beutel ME, Dreier M, Duvén E, Wölfling K. Prevalence, risk factors, and  
503 psychosocial adjustment of problematic gambling in adolescents: Results from two representative  
504 German samples. *Journal of behavioral addictions*. 2018;7(2):339-47.
- 505 32. Dussault F, Dufour M, Brunelle N, Tremblay J, Rousseau M, Leclerc D, et al. Who are the young  
506 poker players? A latent class analysis of high school teenagers. *Psychology of Addictive Behaviors*.  
507 2020;34(2):392.
- 508 33. Farhat LC, Foster DW, Wampler J, Krishnan-Sarin S, Hoff RA, Potenza MN. Casino Gambling in  
509 Adolescents: Gambling-Related Attitudes and Behaviors and Health and Functioning Relationships.  
510 *Journal of Gambling Studies*. 2021:1-17.

- 511 34. Macey J, Hamari J. Investigating relationships between video gaming, spectating esports, and  
512 gambling. *Computers in Human Behavior*. 2018;80:344-53.
- 513 35. Macey J, Hamari J. eSports, skins and loot boxes: Participants, practices and problematic  
514 behaviour associated with emergent forms of gambling. *New Media & Society*. 2019;21(1):20-41.
- 515 36. Scholz TM, Scholz TM, Barlow. *eSports is Business*: Springer; 2019.
- 516 37. Hamari J, Sjöblom M. What is eSports and why do people watch it? *Internet research*.  
517 2017;27(2):211-32.
- 518 38. Rothwell G, Shaffer M. eSports in K-12 and Post-Secondary schools. *Education Sciences*.  
519 2019;9(2):105.
- 520 39. Cho A, Tsaasan A, Steinkuehler C, editors. The building blocks of an educational esports league:  
521 lessons from year one in orange county high schools. *Proceedings of the 14th international conference*  
522 *on the foundations of digital games*; 2019.
- 523 40. Shain KS. *Sowing the Seeds of Peace in the Public-Schools via Esports Gaming with Gamers For*  
524 *Peace*. 2022.
- 525 41. Roberts A, Murphy R, McNally E-J, Derevensky J, Sharman S. Teacher attitudes towards and  
526 awareness of adolescent gambling behavior in the UK. *International Gambling Studies*. 2022:1-25.
- 527 42. Jessor R, Jessor SL. *Problem behavior and psychosocial development: A longitudinal study of*  
528 *youth*: New York: Academic Press; 1977.
- 529 43. Donovan JE, Jessor R. *Problem behavior theory and the problem behavior syndrome. The*  
530 *Origins and development of problem behavior theory*: Springer; 2016. p. 89-109.
- 531 44. Donovan JE, Jessor R. Structure of problem behavior in adolescence and young adulthood.  
532 *Journal of consulting and clinical psychology*. 1985;53(6):890.
- 533 45. Zhai ZW, Duenas GL, Wampler J, Potenza MN. Gambling, substance use and violence in male and  
534 female adolescents. *Journal of gambling studies*. 2020;36:1301-24.
- 535 46. SAS Institute I. *SAS® 9.3. Software*. SAS Institute, Inc. Cary, NC; 2011.
- 536 47. Zhai ZW, Duenas GL, Wampler J, Potenza MN. Gambling, substance use and violence in male and  
537 female adolescents. *Journal of gambling studies*. 2020;36(4):1301-24.
- 538 48. Peters EN, Nordeck C, Zanetti G, O'Grady KE, Serpelloni G, Rimondo C, et al. Relationship of  
539 gambling with tobacco, alcohol, and illicit drug use among adolescents in the USA: Review of the  
540 literature 2000–2014. *The American Journal on Addictions*. 2015;24(3):206-16.
- 541 49. Latvala T. Trend in 14-16-year-old adolescents' weekly gambling from 2008 to 2017: The role of  
542 alcohol use and socioeconomic status. *European Conference on Addictive Behaviors and Dependencies*.  
543 2022.
- 544 50. Merkouris SS, Thomas AC, Shandley KA, Rodda SN, Oldenhof E, Dowling NA. An update on  
545 gender differences in the characteristics associated with problem gambling: A systematic review.  
546 *Current Addiction Reports*. 2016;3:254-67.
- 547 51. Ahuja M, Werner KB, Cunningham-Williams RM, Bucholz KK. Racial associations between  
548 gambling and suicidal behaviors among black and white adolescents and young adults. *Current addiction*  
549 *reports*. 2021;8(2):246-54.
- 550 52. Wilson AN, Salas-Wright CP, Vaughn MG, Maynard BR. Gambling prevalence rates among  
551 immigrants: A multigenerational examination. *Addictive behaviors*. 2015;42:79-85.
- 552 53. Kong G, Tsai J, Pilver CE, Tan HS, Hoff RA, Cavallo DA, et al. Differences in gambling problem  
553 severity and gambling and health/functioning characteristics among Asian-American and Caucasian  
554 high-school students. *Psychiatry research*. 2013;210(3):1071-8.
- 555 54. Steinberg L, Blatt-Eisengart I, Cauffman E. Patterns of competence and adjustment among  
556 adolescents from authoritative, authoritarian, indulgent, and neglectful homes: A replication in a sample  
557 of serious juvenile offenders. *Journal of research on adolescence*. 2006;16(1):47-58.



- 558 55. Farhat LC, Roberto AJ, Wampler J, Steinberg MA, Krishnan-Sarin S, Hoff RA, et al. Self-injurious  
559 behavior and gambling-related attitudes, perceptions and behaviors in adolescents. *Journal of*  
560 *psychiatric research*. 2020;124:77-84.
- 561 56. Buelow M. *Risky decision making in psychological disorders*: Academic Press; 2020.
- 562 57. Afifi TO, Cox BJ, Katz LY. The associations between health risk behaviours and suicidal ideation  
563 and attempts in a nationally representative sample of young adolescents. *The Canadian Journal of*  
564 *Psychiatry*. 2007;52(10):666-74.
- 565 58. Weinberger AH, Franco CA, Hoff RA, Pilver C, Steinberg MA, Rugle L, et al. Cigarette smoking,  
566 problem-gambling severity, and health behaviors in high-school students. *Addictive Behaviors Reports*.  
567 2015;1:40-8.
- 568 59. Becker TD, Rice TR. Youth vaping: a review and update on global epidemiology, physical and  
569 behavioral health risks, and clinical considerations. *European Journal of Pediatrics*. 2021:1-10.
- 570 60. Frisone F, Settineri S, Sicari P, Federica, Merlo EM. Gambling in adolescence: a narrative review  
571 of the last 20 years. *Journal of Addictive Diseases*. 2020;38(4):438-57.
- 572 61. Bergevin T, Gupta R, Derevensky J, Kaufman F. Adolescent gambling: Understanding the role of  
573 stress and coping. *Journal of gambling studies*. 2006;22(2):195-208.
- 574 62. Dickson L, Derevensky JL, Gupta R. Youth gambling problems: Examining risk and protective  
575 factors. *International Gambling Studies*. 2008;8(1):25-47.
- 576 63. Felsher JR, Derevensky JL, Gupta R. Young adults with gambling problems: The impact of  
577 childhood maltreatment. *International Journal of Mental Health and Addiction*. 2010;8(4):545-56.
- 578 64. Blaszczynski A, Nower L. A pathways model of problem and pathological gambling. *Addiction*.  
579 2002;97(5):487-99.
- 580 65. Gupta R, Nower L, Derevensky JL, Blaszczynski A, Faregh N, Temcheff C. Problem gambling in  
581 adolescents: an examination of the pathways model. *Journal of Gambling Studies*. 2013;29(3):575-88.
- 582 66. Williams AD, Grisham JR, Erskine A, Cassidy E. Deficits in emotion regulation associated with  
583 pathological gambling. *British Journal of Clinical Psychology*. 2012;51(2):223-38.
- 584 67. Turner NE, Macdonald J, Bartoshuk M, Zangeneh M. Adolescent gambling behaviour, attitudes,  
585 and gambling problems. *International Journal of Mental Health and Addiction*. 2008;6(2):223-37.
- 586 68. Marchica LA, Mills DJ, Derevensky JL, Montreuil TC. The role of emotion regulation in video  
587 gaming and gambling disorder: A systematic review. *Canadian Journal of Addiction*. 2019;10(4):19-29.
- 588 69. Kökönyei G, Kocsel N, Király O, Griffiths MD, Galambos A, Magi A, et al. The role of cognitive  
589 emotion regulation strategies in problem gaming among adolescents: A nationally representative survey  
590 study. *Frontiers in Psychiatry*. 2019;10:273.
- 591 70. Jauregui P, Estevez A. Predictive role of attachment, coping, and emotion regulation in gambling  
592 motives of adolescents and young people. *Journal of Gambling Studies*. 2020;36(4):1283-300.
- 593 71. Koly KN, Islam MS, Potenza MN, Mahumud RA, Islam MS, Uddin MS, et al. Psychosocial health of  
594 school-going adolescents during the COVID-19 pandemic: Findings from a nationwide survey in  
595 Bangladesh. *PloS one*. 2023;18(3):e0283374.
- 596 72. Håkansson A, Widinghoff C. Gender differences in problem gamblers in an online gambling  
597 setting. *Psychology Research and Behavior Management*. 2020;13:681.
- 598 73. Håkansson A, Fernández-Aranda F, Menchón JM, Potenza MN, Jiménez-Murcia S. Gambling  
599 during the COVID-19 crisis—a cause for concern. *Journal of addiction medicine*. 2020;14(4):e10.
- 600 74. Pietro F, Mehmet V, Fugen CC, Luigi N, Tudor LP, Julije M, et al. The Risk of Gambling Disorders  
601 in Children and Adolescents. 2019.
